# Supplementary material
Source: PubMed Central journal article supplement (PMC3071150)

Supplementary Figure 1

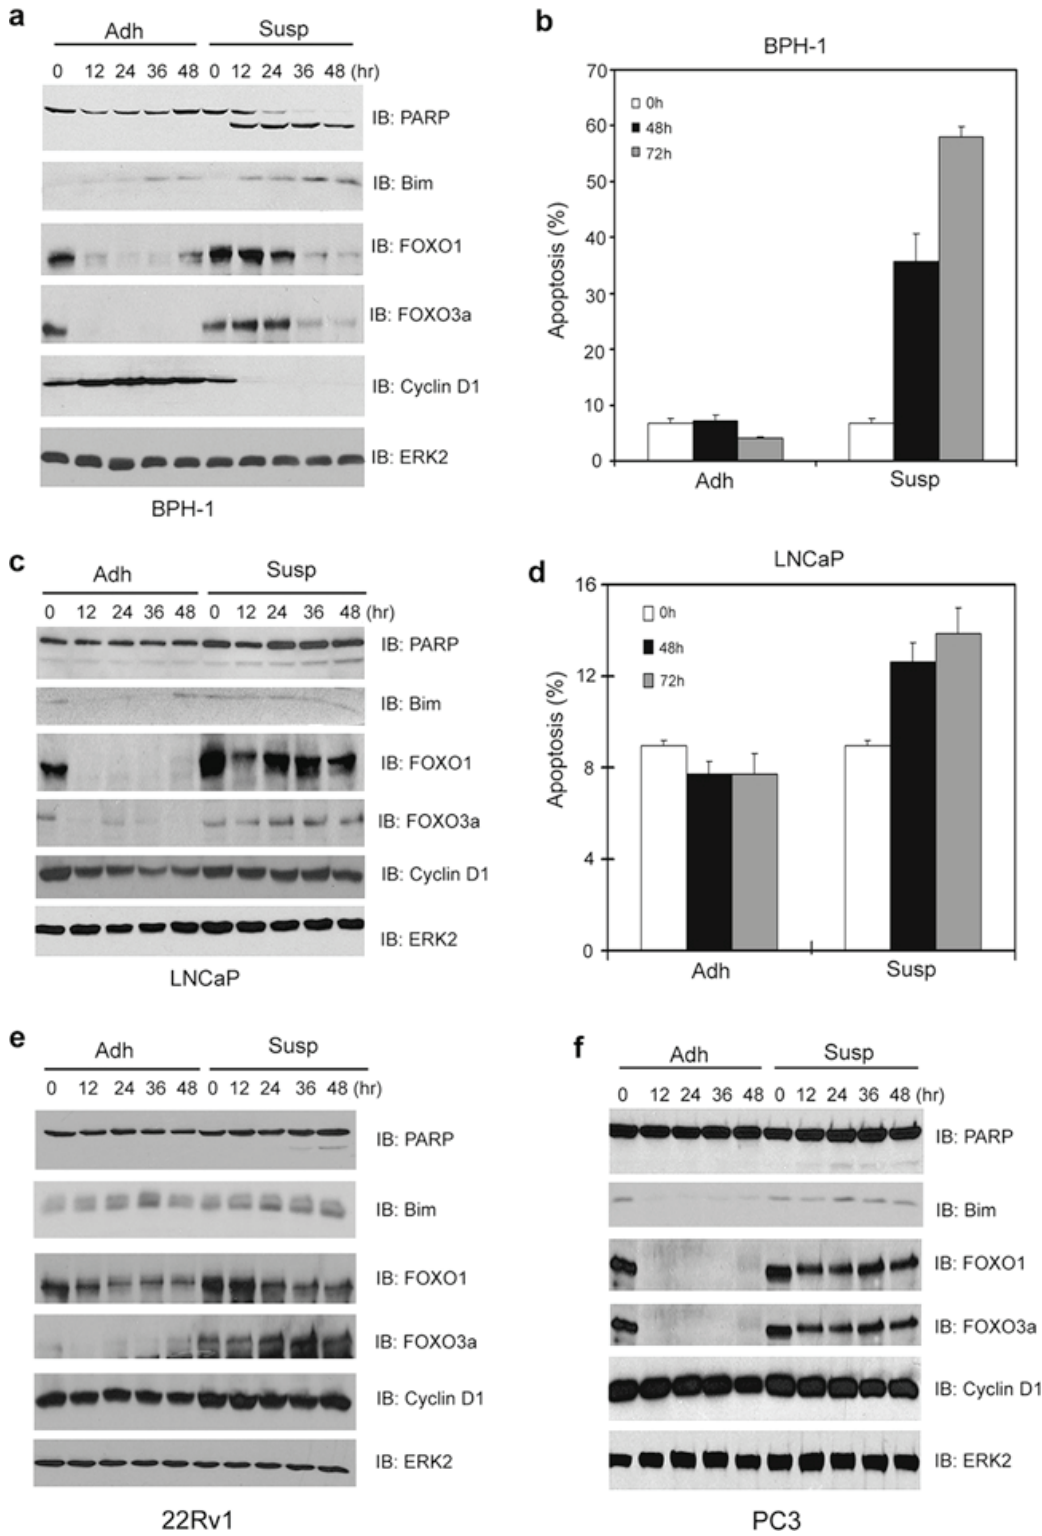

Supplementary Figure 2

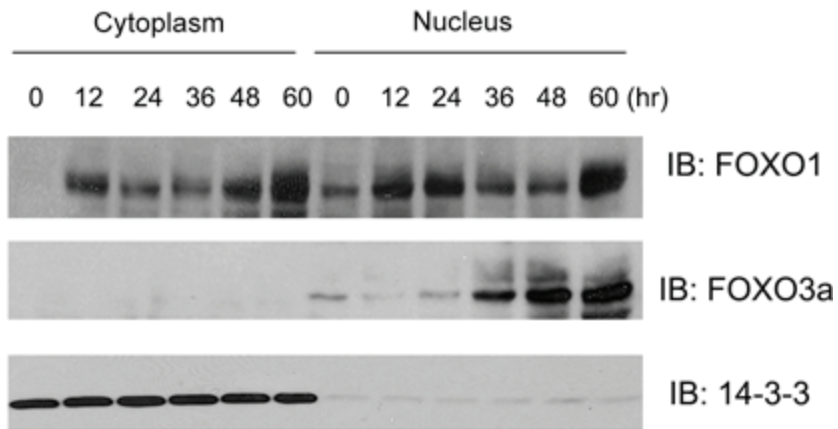

Supplementary Figure 3

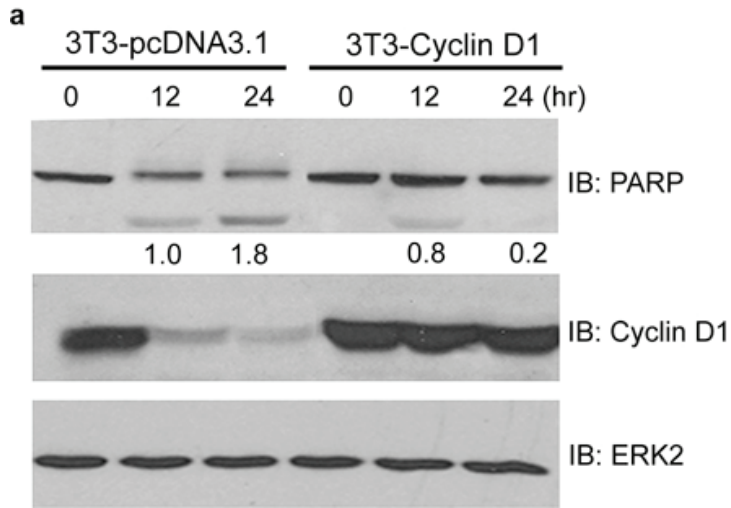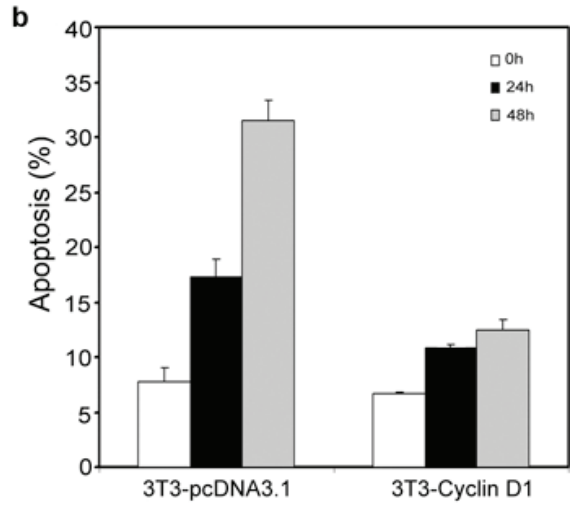

Supplementary Figure 4

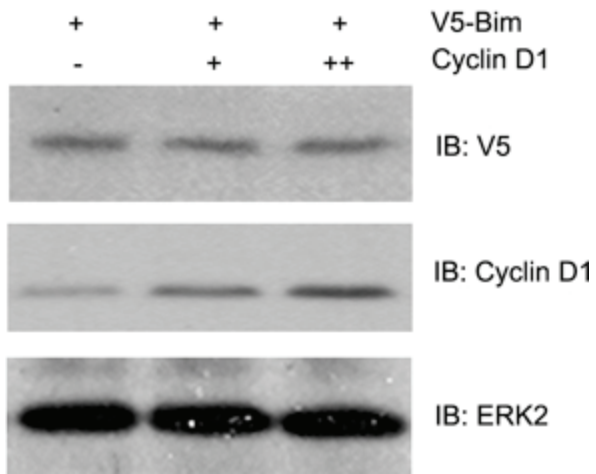

### Supplementary Figure 5

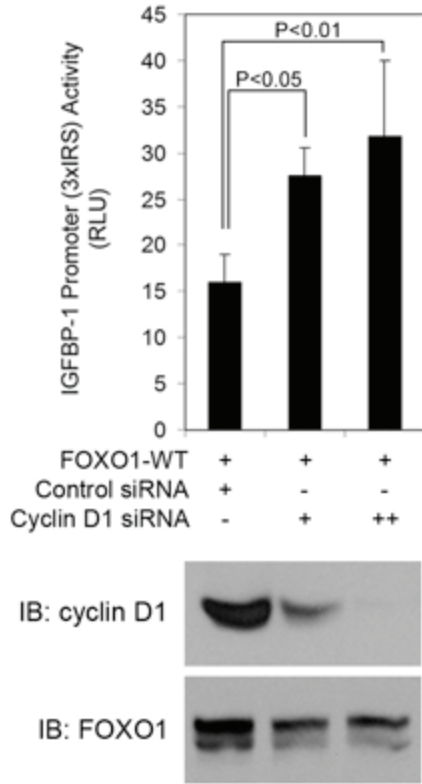

Supplementary Figure 6

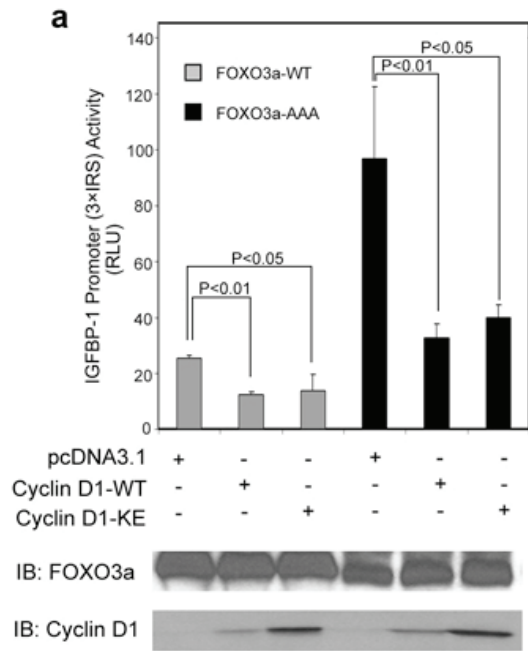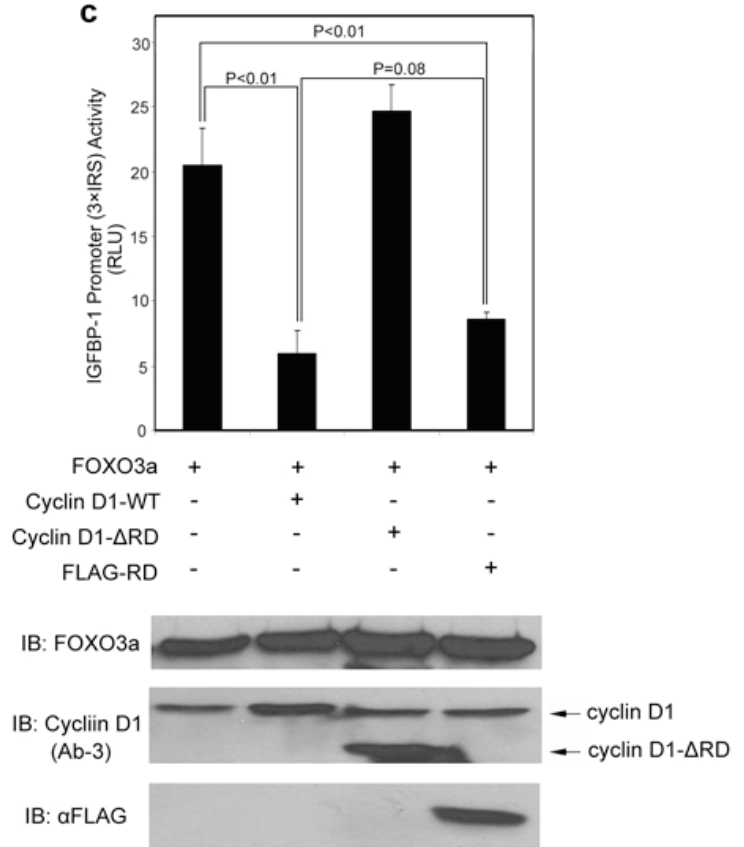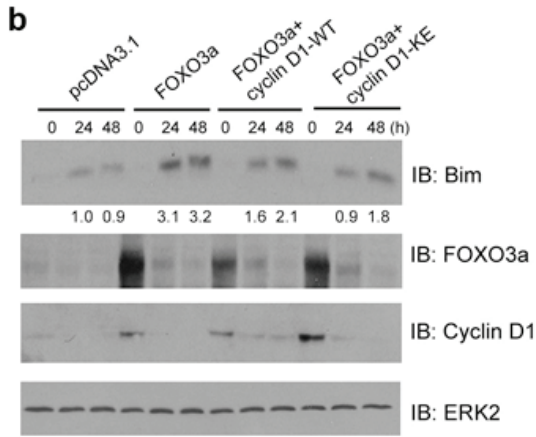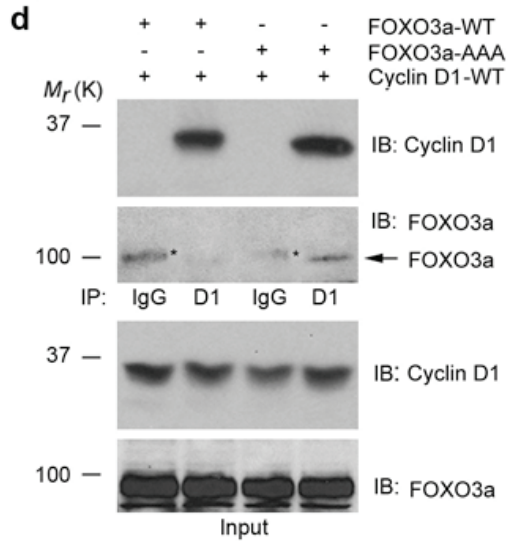

Supplementary Figure 7

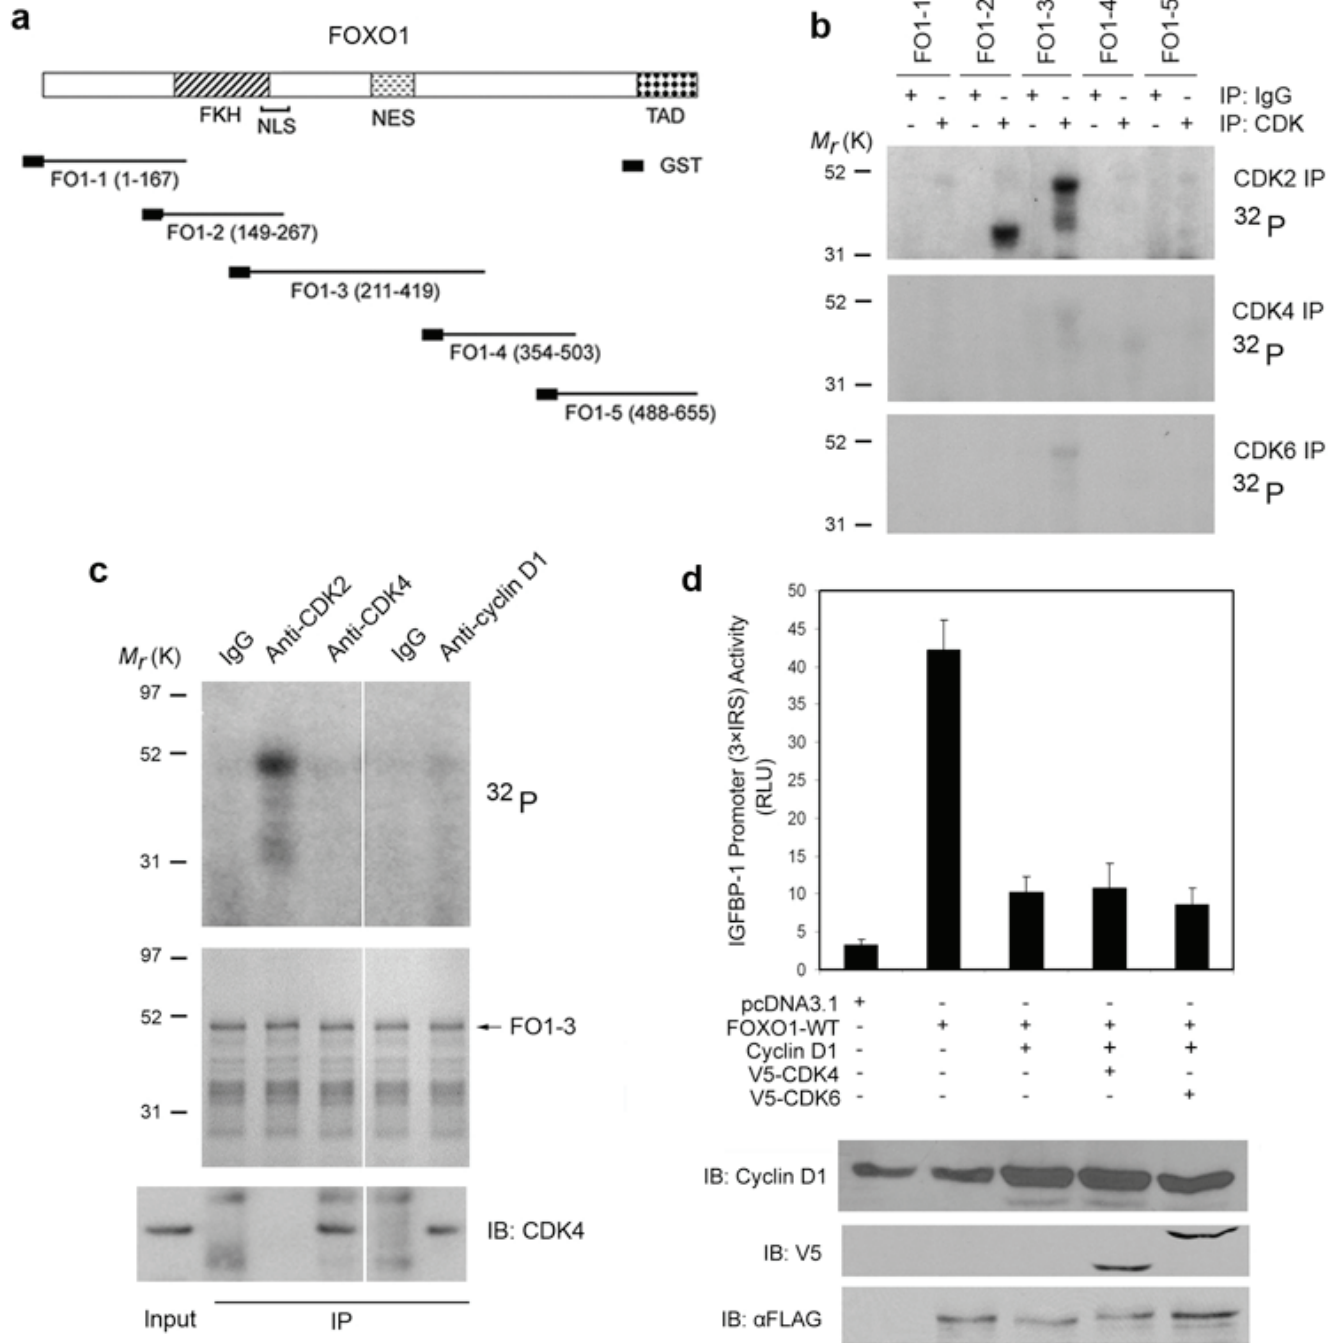

Supplementary Figure 8

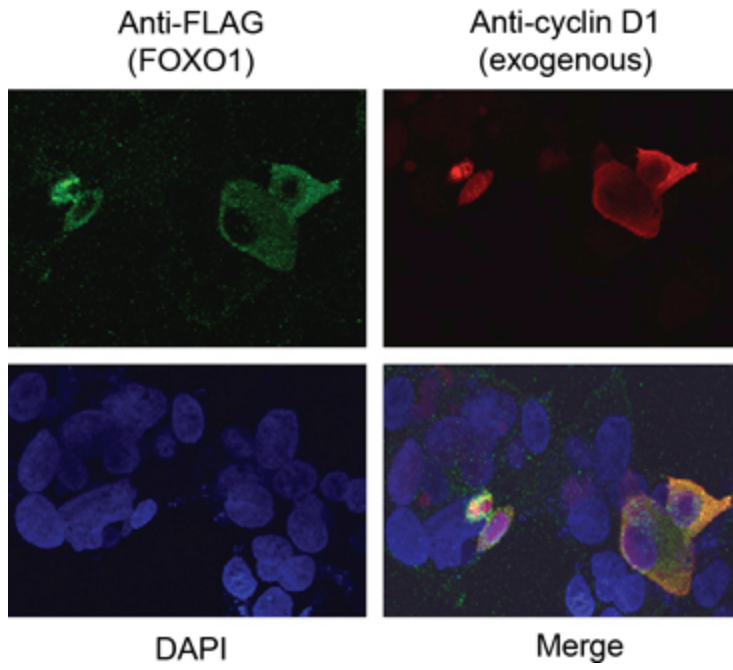



Supplementary Figure 9

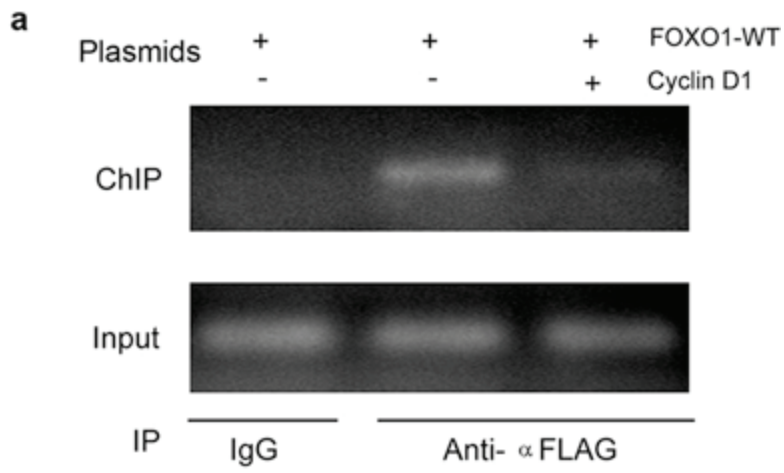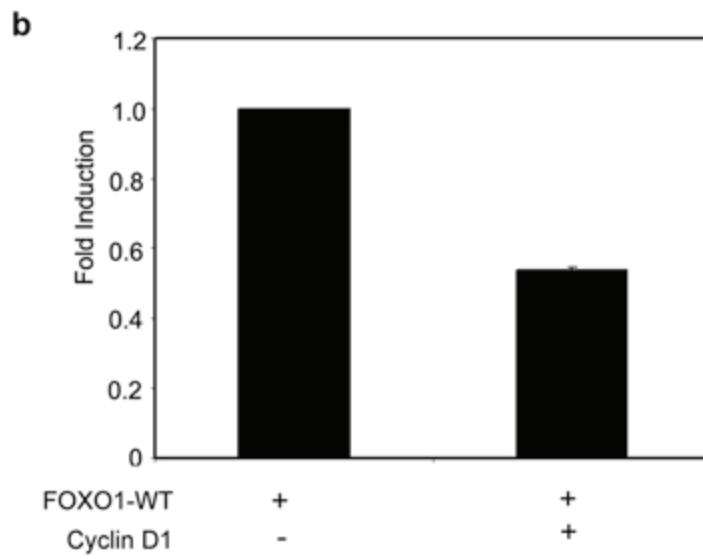

Supplementary Figure 10

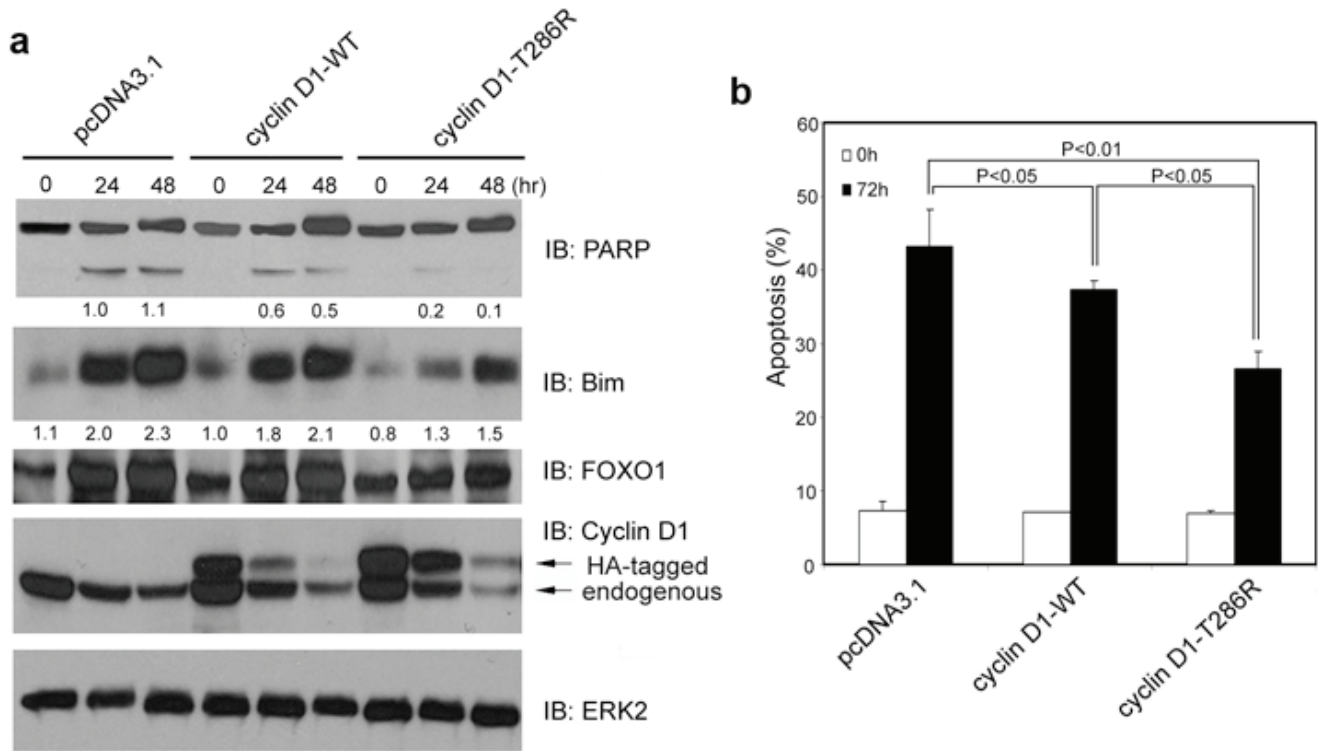

Supplementary Figure 11

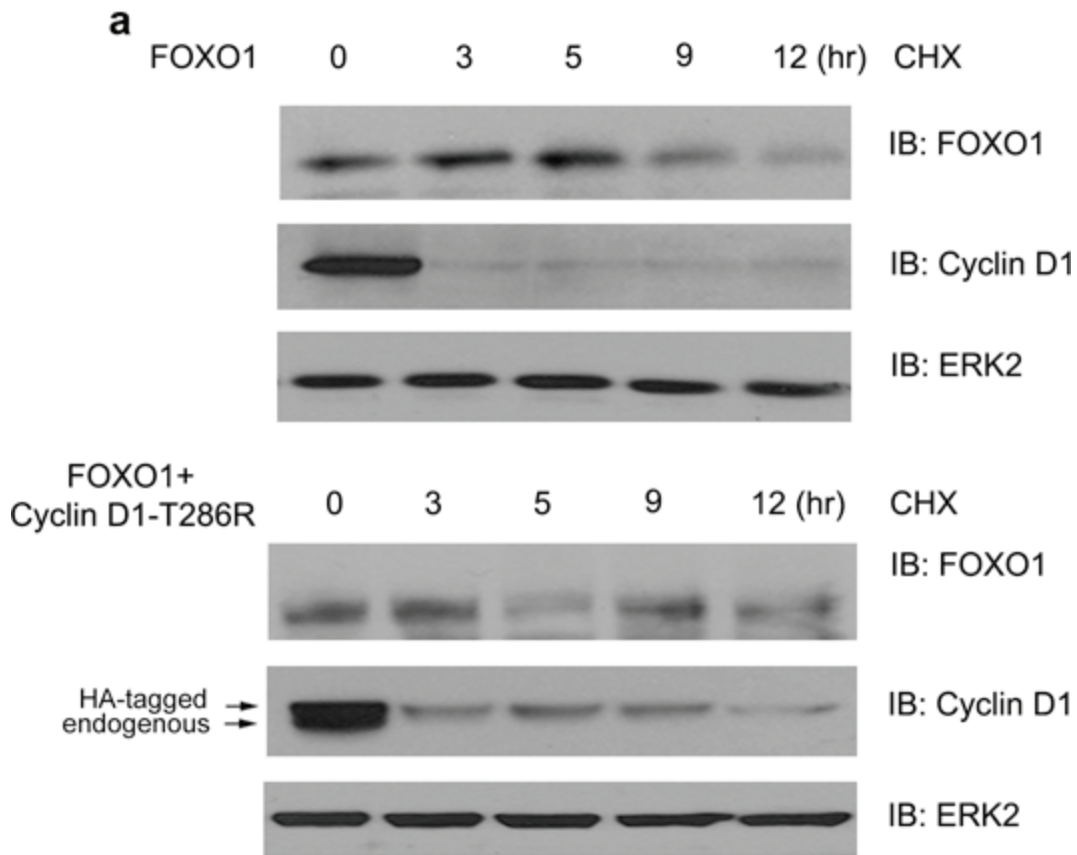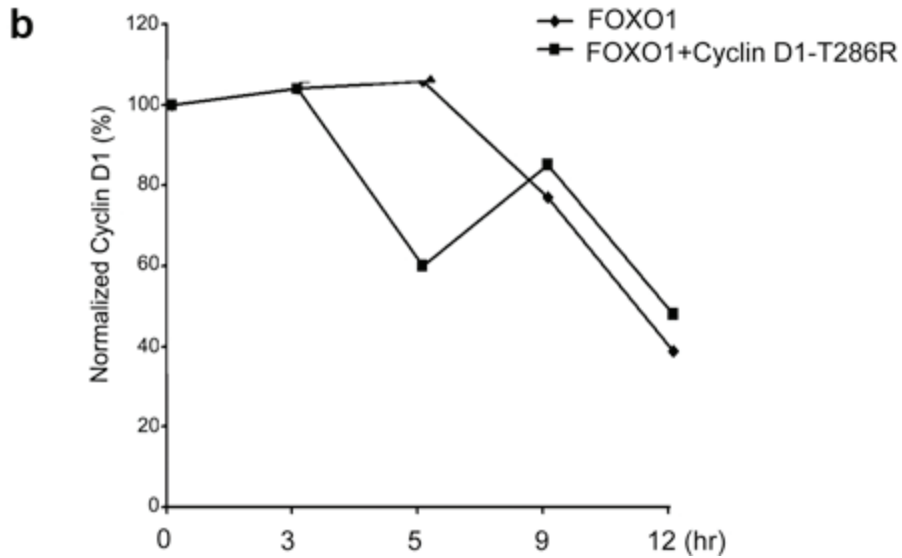

Supplementary Figure 12

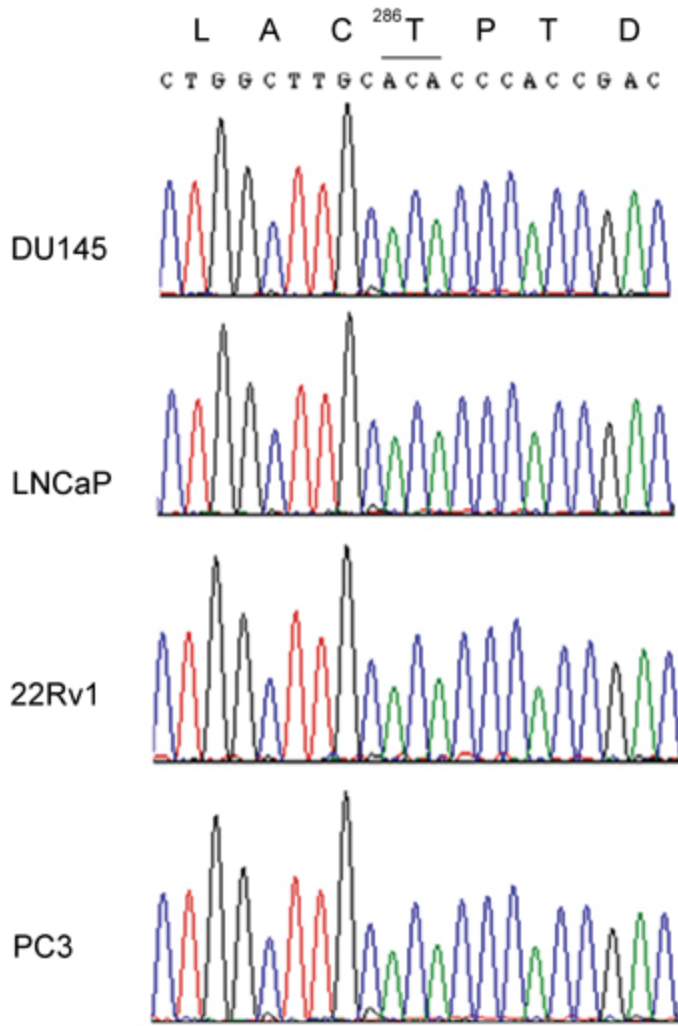

Supplement: NIHMS282629-supplement-Supplemental_Figures.pdf [file NIHMS282629-supplement-Supplemental_Figures.pdf]
